# Supplementary material for: The inorganic cation-tailored “trapdoor” effect of silicoaluminophosphate zeolite for highly selective CO2 separation
Source: Royal Society of Chemistry journal article supplement (doi:10.1039/d1sc00619c), 2021-01-01

# “Trapdoor” Effect of Silicoaluminophosphate Zeolite Aids in Highly Selective Carbon Dioxide Separation

Solid nanoporous materials like silicoaluminophosphate (SAPO) zeolites exhibit excellent carbon dioxide ( $\text{CO}_2$ ) capture and separation abilities

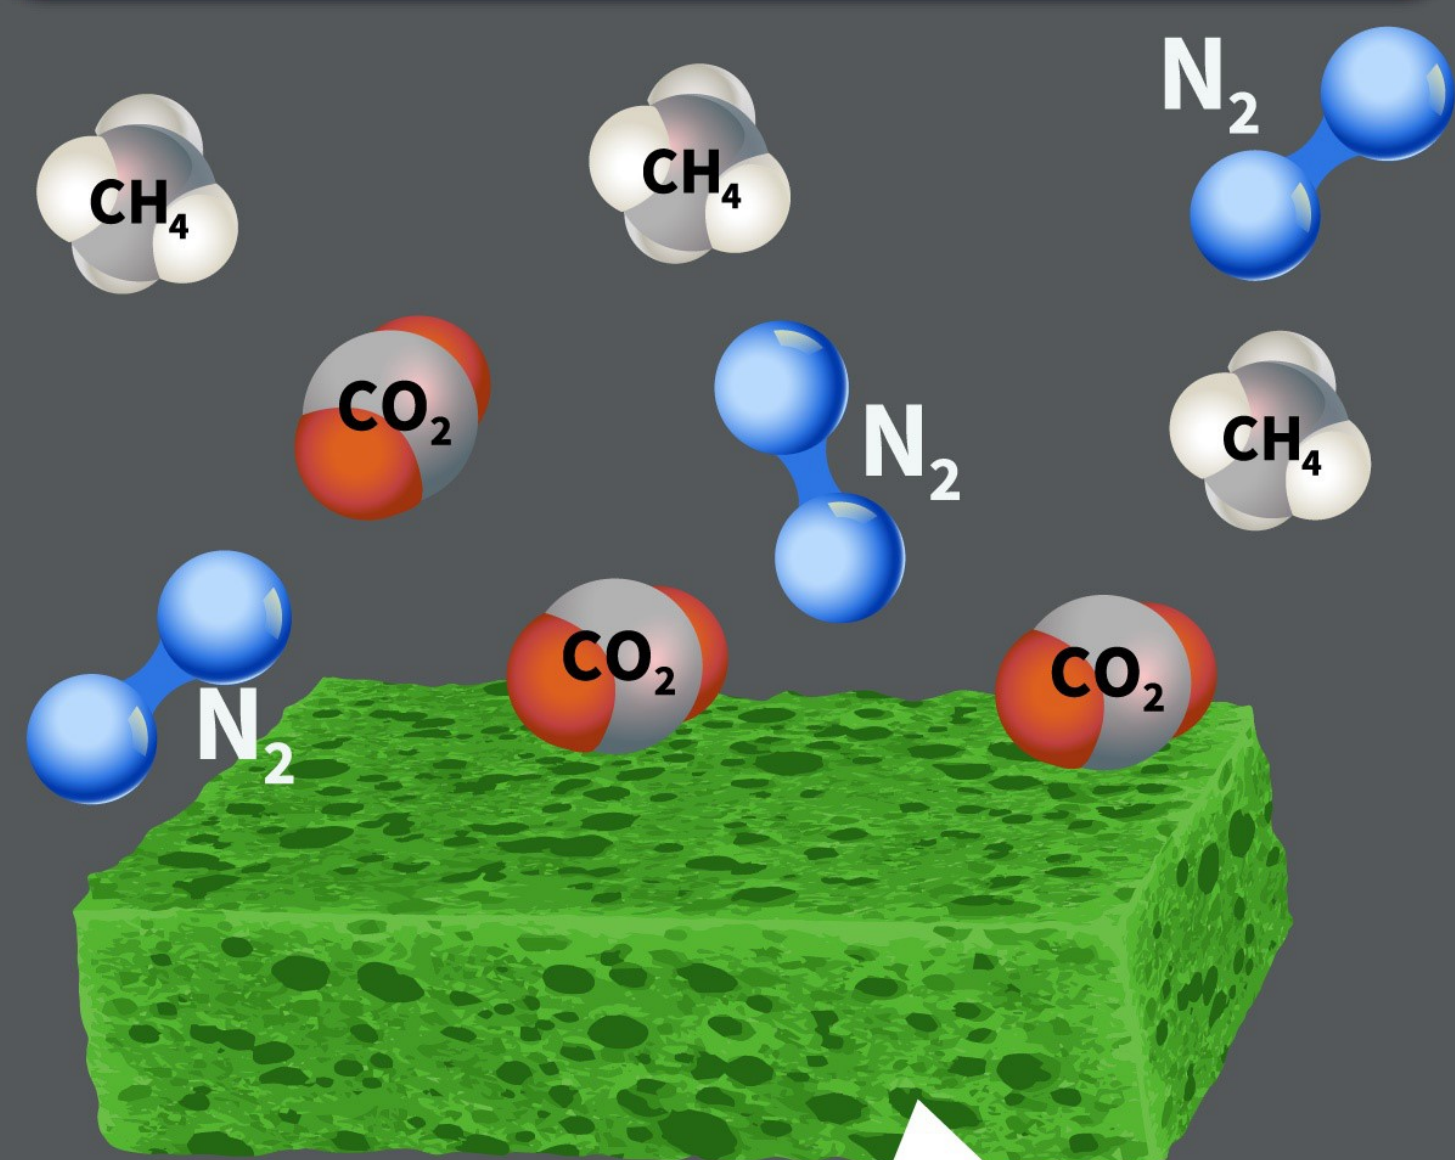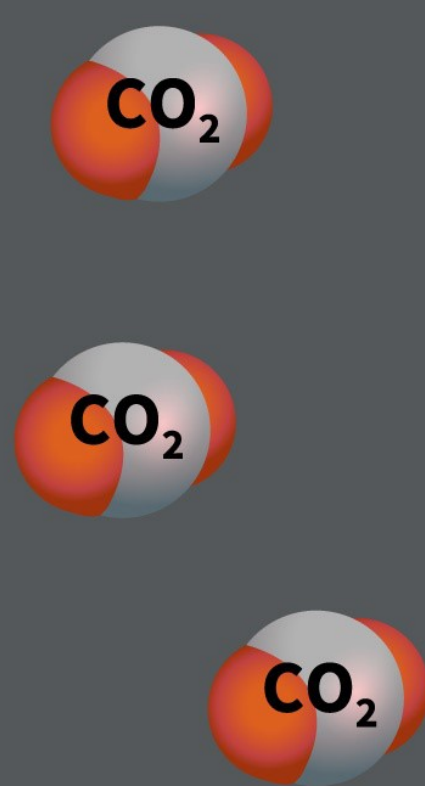

Introducing an inorganic cation into the SAPO zeolite structure may increase  $\text{CO}_2$  selectivity but could result in the collapse of the framework

A novel SAPO zeolite with cation-induced *trapdoor effect* for separation of  $\text{CO}_2$  from methane ( $\text{CH}_4$ ) and nitrogen ( $\text{N}_2$ ) is reported using a direct ion-exchange approach

## Trapdoor effect

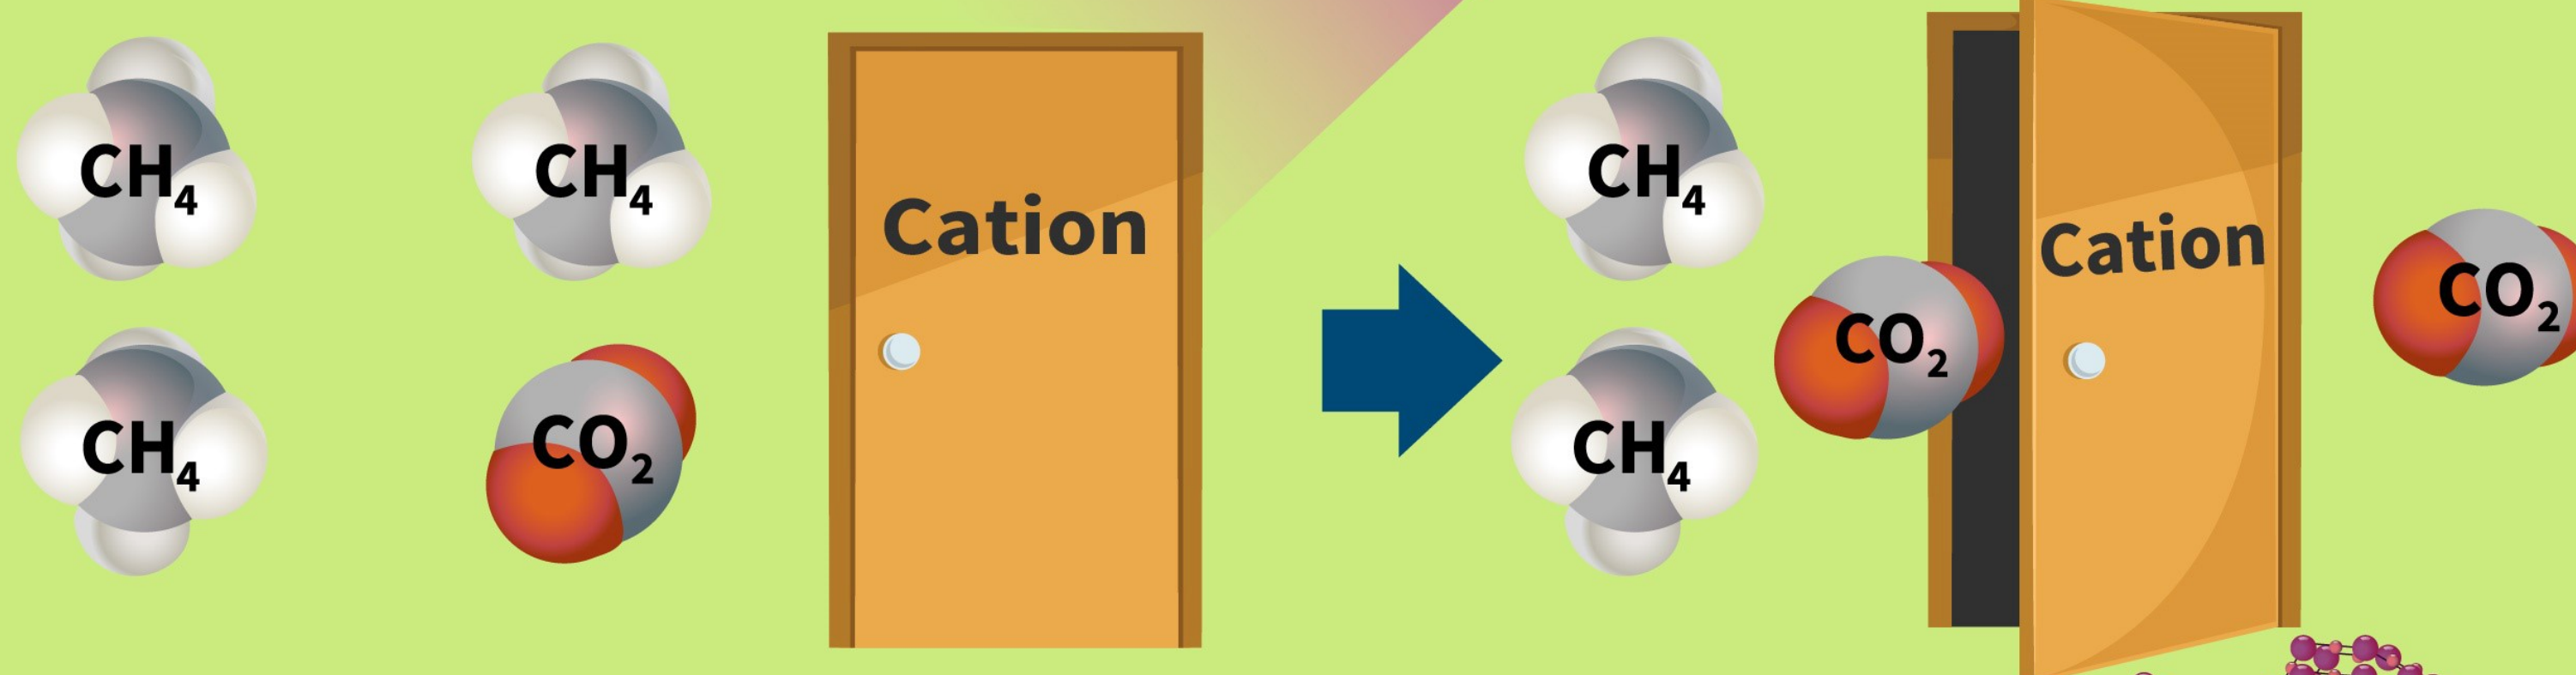

- Unprecedented  $\text{CO}_2/\text{CH}_4$  separation factor
- Enhanced trapdoor effect
- High selectivity towards  $\text{CO}_2$

Highly selective SAPO zeolites with their tailored inorganic cation **trapdoor effect** can be used for  $\text{CO}_2$  capture from flue gas, refinery exhausts, and air

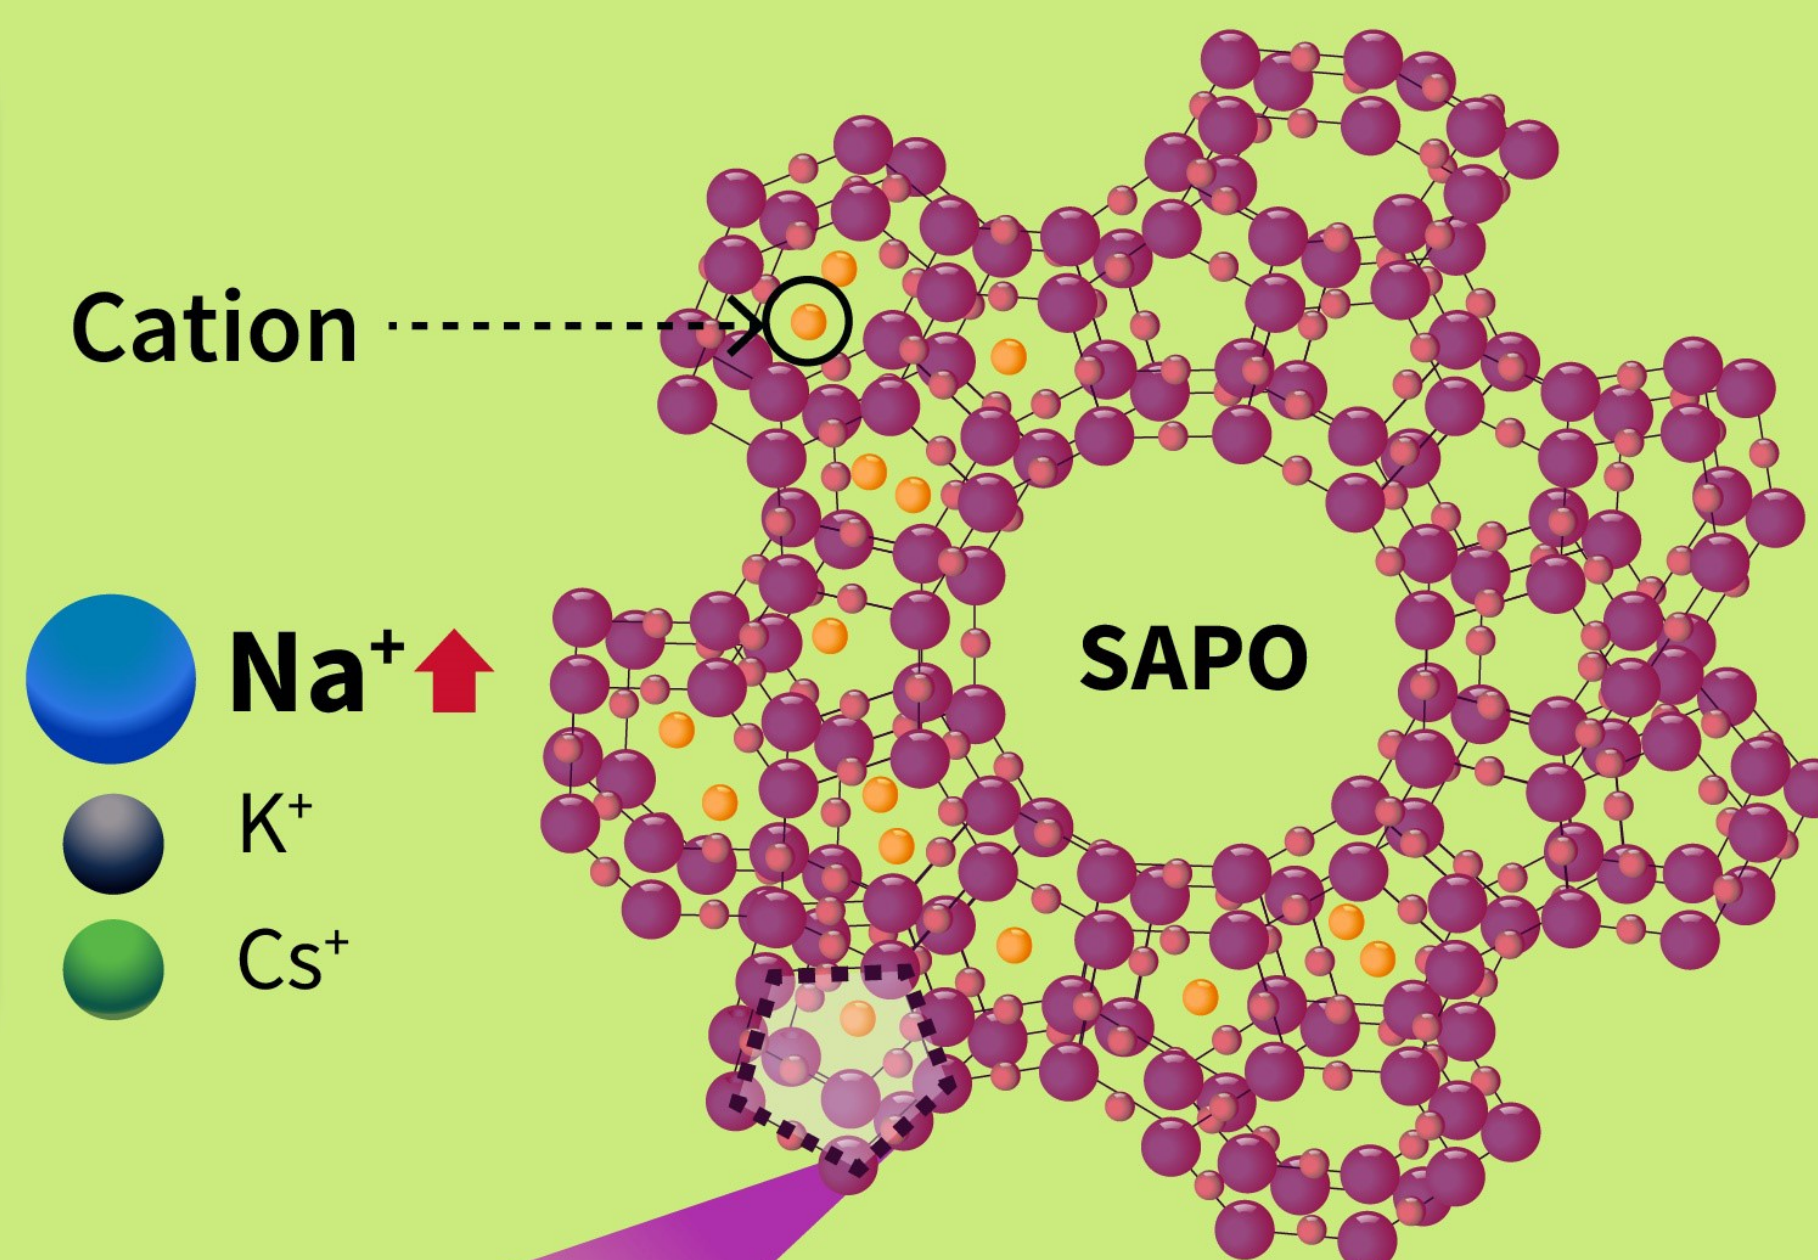

Supplement: d1sc00619c1.pdf [file d1sc00619c1.pdf]
